# Supplementary material for: On the mechanism of isospecific epoxide polymerization by salen cobalt(III) complexes: Evidence for solid-state catalysis
Source: Royal Society of Chemistry journal article supplement (doi:10.1039/b914573g), 2009-01-01
Supplement: b914573g.pdf [file b914573g.pdf]

## Supporting Information for:

### On the mechanism of isospecific epoxide polymerization by salen cobalt (III) complexes: Evidence for solid-state catalysis

Hiroharu Ajiro, Kathryn L. Peretti, Emil B. Lobkovsky and Geoffrey W. Coates\*

*Department of Chemistry and Chemical Biology, Baker Laboratory, Cornell University, Ithaca, New York, 14853-1301, USA*

**General Procedures.** All air or water sensitive reactions were carried out under nitrogen in Braun Labmaster dryboxes or using standard Schlenk-line techniques. Propylene oxide (PO) was dried over calcium hydride and vacuum transferred before use. Toluene, tetrahydrofuran, methylene chloride, diethyl ether, and hexanes were dried by passing through a column of activated alumina and degassed by sparging with dry nitrogen prior to use. Absolute ethanol was degassed by sparging with dry nitrogen and used without further purification. All other reagents were purchased from commercial sources and used as received. *N,N'*-Bis-(3,5-di-*tert*-butylsalicylidene)-1,2-benzenediamine was prepared according to literature procedure (J. Woltinger, J. E. Backvall, A. Zsigmond, *Chem. Eur. J.* 1999, **5**, 1460-1467), and complexes **1-9** were synthesized using reported procedures (K. L. Peretti, H. Ajiro, C. T. Cohen, E. B. Lobkovsky, and G. W. Coates, *J. Am. Chem. Soc.*, 2005, **127**, 11566-11567).

NMR spectroscopy was performed using Varian Unity (500 MHz), INOVA (400 MHz), and Mercury (300 MHz) spectrometers. All spectra were referenced by residual solvent shifts. PPO isotacticity (isotactic triad: [*mm*] and dyad: [*m*]), was determined by inspection of the methine peaks in the  $^{13}\text{C}\{^1\text{H}\}$  NMR spectra of polymer samples (W. Hirahata, R. M. Thomas, E. B. Lobkovsky, and G. W. Coates, *J. Am. Chem. Soc.*, 2008, **130**, 17658-17659). Crystallographic data were collected at 173(2) K using a Siemens SMART CCD Area Detector System ( $M_0$   $K_{\alpha}$ ,  $\lambda = 0.71073$ ) and frames were integrated with the Siemens SAINT program.  $M_n$  and molecular weight distributions ( $M_w/M_n$ ) were measured by high temperature gel-permeation chromatography. Data were collected using a Waters Alliance GPCV 2000 size exclusion chromatograph equipped with a Waters DRI detector and viscometer. The column set (four Waters HT 6E and one Waters HT 2) was eluted with 1,2,4-trichlorobenzene containing approximately 0.01 wt% di-*tert*-butylhydroxytoluene (BHT) at 1.0 mL/min, at 140 °C calibrated with polystyrene standards.

**Synthesis of (salph)Co( $\mu$ -MeOH)OMe( $\mu$ -MeOH) (**10**).** A 2 L round bottom flask was charged with (salph)Co (2.0 g, 3.3 mmol) and KOH (0.21 g, 3.7 mmol). Methanol (2 L) was then added, and the mixture was stirred overnight, open to air. The mixture was filtered through a Büchner funnel, and the filtrate solution was transferred into a glass bottle which was allowed to sit open to air for 7 days. After approximately half of the methanol evaporated, filtration gave dark red crystals of **10** (1.6 g, 68%).  $^1\text{H}$  NMR (anhydrous DMSO- $d_6$ , 300 MHz):  $\delta$  1.15 (s, 3H, OCH<sub>3</sub>), 1.32 (s, 18H, *t*Bu), 1.67 (s, 18H, *t*Bu), 7.36 (d,  $J = 2.7$  Hz, 2H, Ar), 7.39 (dd,  $J = 3.6$  Hz and 6.3 Hz, 2H, Ar), 7.44 (d,  $J = 2.7$  Hz, 2H, Ar), 8.42 (dd,  $J = 3.6$  Hz and 6.2 Hz, 2H, Ar), 8.73 (s, 2H, Ar). IR (KBr,  $\text{cm}^{-1}$ ): 743, 1031 1172, 1360, 1388, 1429, 1463, 1521, 1579, 1613, 2868, 2905, 2955.

**Representative Procedure for PO Polymerization.** In the glovebox, a Schlenk tube was charged with **10** (20 mg, 0.029 mmol) and a Teflon-coated stir bar, then sealed and removed from the glovebox. Toluene (1.85 mL) was added under N<sub>2</sub> and the solution was brought to 0 °C. PO (1.0 mL, 0.812 g, 14 mmol) was added *via* airtight syringe, and was stirred for 10 h at 0 °C. An aliquot was taken from the reaction mixture for NMR spectroscopic analysis before it was quenched with 1N HCl<sub>aq</sub> (5.0 mL). Unreacted PO was removed under vacuum, and CH<sub>2</sub>Cl<sub>2</sub> (20 mL) was added to dissolve the precipitated polymer. The organic layer was separated and solvent was removed by rotary evaporation at 22 °C (620 mg, 76%). The polymer was purified by dissolving in acetone at 50 °C (10 mL) then adding the resulting solution dropwise to acetone (500 mL) at 25 °C. The polymer solution was cooled to 0 °C for 3 h. The white precipitate was filtered and dried in vacuo to constant weight (600 mg, 74%).

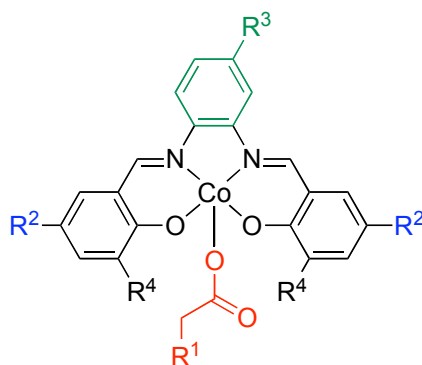

Table S1. Polymerization of *rac*-Propylene Oxide using Cobalt Carboxylate Catalysts (1-9).

| cplx.    | R <sup>1</sup> | R <sup>2</sup>                                   | R <sup>3</sup> | R <sup>4</sup>  | T <sub>rxn</sub> (h) | Conv. (%) | [ <i>mm</i> ] (%) | M <sub>n</sub> (g mol <sup>-1</sup> ) | PDI (M <sub>w</sub> /M <sub>n</sub> ) |
|----------|----------------|--------------------------------------------------|----------------|-----------------|----------------------|-----------|-------------------|---------------------------------------|---------------------------------------|
| <b>1</b> | H              | <sup>t</sup> Bu                                  | H              | <sup>t</sup> Bu | 2                    | 89        | > 99              | 287 000                               | 1.40                                  |
| <b>2</b> | H              | <sup>t</sup> Bu                                  | H              | <sup>t</sup> Pr | 10                   | 11        | 69                | 184 000                               | 1.22                                  |
| <b>3</b> | Ph             | <sup>t</sup> Bu                                  | H              | <sup>t</sup> Bu | 4                    | 89        | > 99              | 423 000                               | 1.40                                  |
| <b>4</b> | 1-Nap          | <sup>t</sup> Bu                                  | H              | <sup>t</sup> Bu | 10                   | 16        | > 99              | 28 000                                | 1.59                                  |
| <b>5</b> | H              | Me                                               | H              | <sup>t</sup> Bu | 24                   | < 1       | ND                | ND                                    | ND                                    |
| <b>6</b> | H              | CMe <sub>2</sub> CH <sub>2</sub> <sup>t</sup> Bu | H              | <sup>t</sup> Bu | 24                   | < 1       | ND                | ND                                    | ND                                    |
| <b>7</b> | H              | <sup>t</sup> Bu                                  | OMe            | <sup>t</sup> Bu | 18                   | 79        | > 99              | 71 900                                | 4.09                                  |
| <b>8</b> | H              | <sup>t</sup> Bu                                  | Me             | <sup>t</sup> Bu | 18                   | < 1       | ND                | ND                                    | ND                                    |
| <b>9</b> | H              | <sup>t</sup> Bu                                  | Cl             | <sup>t</sup> Bu | 18                   | < 1       | ND                | ND                                    | ND                                    |

### Crystal data and structure refinement for (salph)Co( $\mu$ -MeOH)OMe( $\mu$ -MeOH) (**10**)

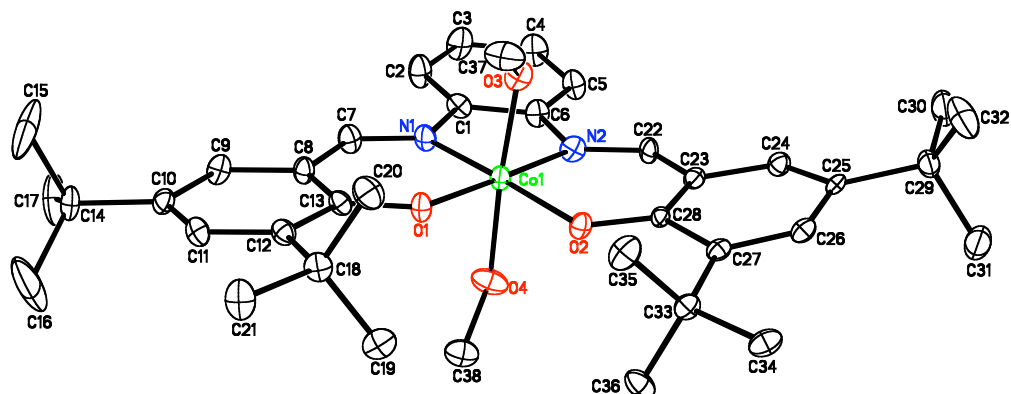

Table S2. Crystal data and structure refinement for **10**.

|                                   |                                                                  |         |
|-----------------------------------|------------------------------------------------------------------|---------|
| Identification code               | ha4                                                              |         |
| Empirical formula                 | C <sub>39</sub> H <sub>57</sub> Co N <sub>2</sub> O <sub>5</sub> |         |
| Formula weight                    | 692.80                                                           |         |
| Temperature                       | 173(2) K                                                         |         |
| Wavelength                        | 0.71073 Å                                                        |         |
| Crystal system                    | Orthorhombic                                                     |         |
| Space group                       | Iba2                                                             |         |
| Unit cell dimensions              | a = 23.9083(10) Å                                                | α = 90° |
|                                   | b = 26.4057(10) Å                                                | β = 90° |
|                                   | c = 11.6690(7) Å                                                 | γ = 90° |
| Volume                            | 7366.8(6) Å <sup>3</sup>                                         |         |
| Z                                 | 8                                                                |         |
| Density (calculated)              | 1.249 Mg/m <sup>3</sup>                                          |         |
| Absorption coefficient            | 0.510 mm <sup>-1</sup>                                           |         |
| F(000)                            | 2976                                                             |         |
| Crystal size                      | 0.20 x 0.10 x 0.03 mm <sup>3</sup>                               |         |
| Theta range for data collection   | 1.70 to 24.70°                                                   |         |
| Index ranges                      | -19 ≤ h ≤ 28, -30 ≤ k ≤ 29, -13 ≤ l ≤ 11                         |         |
| Reflections collected             | 15844                                                            |         |
| Independent reflections           | 5578 [R(int) = 0.0404]                                           |         |
| Completeness to theta = 24.70°    | 99.1 %                                                           |         |
| Absorption correction             | Semiempirical by SADABS                                          |         |
| Max. and min. transmission        | 0.9874 and 0.9049                                                |         |
| Refinement method                 | Full-matrix least-squares on F <sup>2</sup>                      |         |
| Data / restraints / parameters    | 5578 / 1 / 510                                                   |         |
| Goodness-of-fit on F <sup>2</sup> | 0.920                                                            |         |
| Final R indices [I > 2σ(I)]       | R1 = 0.0381, wR2 = 0.0868                                        |         |
| R indices (all data)              | R1 = 0.0571, wR2 = 0.0942                                        |         |
| Absolute structure parameter      | 0.507(15)                                                        |         |
| Largest diff. peak and hole       | 0.474 and -0.345 e Å <sup>-3</sup>                               |         |

Table S3. Atomic coordinates ( $\times 10^4$ ) and equivalent isotropic displacement parameters ( $\text{\AA}^2 \times 10^3$ ) for **10**.  $U(\text{eq})$  is defined as one third of the trace of the orthogonalized  $U^{\text{ij}}$  tensor.

|       | x       | y       | z        | U(eq) |
|-------|---------|---------|----------|-------|
| Co(1) | 2393(1) | 1728(1) | 1551(1)  | 17(1) |
| O(1)  | 2882(1) | 1189(1) | 1950(2)  | 19(1) |
| O(2)  | 1900(1) | 1214(1) | 1023(2)  | 19(1) |
| O(3)  | 2696(1) | 1809(1) | 115(2)   | 25(1) |
| O(4)  | 2014(1) | 1688(1) | 3049(3)  | 33(1) |
| N(1)  | 2861(1) | 2239(1) | 2140(3)  | 21(1) |
| N(2)  | 1918(1) | 2275(1) | 1146(3)  | 22(1) |
| C(1)  | 2660(2) | 2739(1) | 1939(3)  | 21(1) |
| C(2)  | 2942(2) | 3186(1) | 2218(4)  | 32(1) |
| C(3)  | 2700(2) | 3649(1) | 1936(4)  | 33(1) |
| C(4)  | 2185(2) | 3665(1) | 1404(5)  | 33(1) |
| C(5)  | 1901(2) | 3220(1) | 1149(4)  | 26(1) |
| C(6)  | 2142(1) | 2756(1) | 1415(4)  | 23(1) |
| C(7)  | 3325(2) | 2161(1) | 2672(4)  | 24(1) |
| C(8)  | 3575(1) | 1681(1) | 2921(3)  | 21(1) |
| C(9)  | 4070(1) | 1693(1) | 3587(4)  | 22(1) |
| C(10) | 4340(1) | 1263(1) | 3916(3)  | 21(1) |
| C(11) | 4120(2) | 807(1)  | 3481(4)  | 20(1) |
| C(12) | 3656(1) | 765(1)  | 2799(3)  | 20(1) |
| C(13) | 3347(2) | 1215(1) | 2534(3)  | 19(1) |
| C(14) | 4863(1) | 1271(1) | 4668(4)  | 26(1) |
| C(15) | 5375(2) | 1237(2) | 3910(5)  | 72(2) |
| C(16) | 4859(3) | 830(2)  | 5512(6)  | 99(3) |
| C(17) | 4910(2) | 1753(1) | 5385(5)  | 52(1) |
| C(18) | 3466(2) | 245(1)  | 2346(4)  | 21(1) |
| C(19) | 2881(1) | 122(1)  | 2765(4)  | 28(1) |
| C(20) | 3481(2) | 241(1)  | 1035(4)  | 29(1) |
| C(21) | 3857(2) | -182(1) | 2750(4)  | 31(1) |
| C(22) | 1475(1) | 2226(1) | 510(3)   | 20(1) |
| C(23) | 1255(1) | 1763(1) | 76(3)    | 18(1) |
| C(24) | 809(1)  | 1815(1) | -721(3)  | 20(1) |
| C(25) | 568(1)  | 1410(1) | -1260(3) | 18(1) |
| C(26) | 761(1)  | 926(1)  | -879(3)  | 19(1) |
| C(27) | 1176(1) | 843(1)  | -89(3)   | 16(1) |
| C(28) | 1466(1) | 1279(1) | 369(3)   | 14(1) |
| C(29) | 121(1)  | 1455(1) | -2186(3) | 24(1) |
| C(30) | 35(2)   | 2008(1) | -2567(4) | 39(1) |
| C(31) | -434(2) | 1258(1) | -1722(4) | 37(1) |
| C(32) | 294(2)  | 1150(2) | -3251(4) | 47(1) |
| C(33) | 1327(1) | 306(1)  | 296(3)   | 19(1) |
| C(34) | 945(1)  | -94(1)  | -245(4)  | 26(1) |
| C(35) | 1934(1) | 181(1)  | -77(4)   | 29(1) |
| C(36) | 1265(2) | 258(1)  | 1590(5)  | 26(1) |
| C(37) | 2969(2) | 1397(2) | -439(5)  | 40(1) |
| C(38) | 2009(2) | 1252(1) | 3766(4)  | 33(1) |
| O(1S) | 3201(1) | 2584(1) | -636(3)  | 47(1) |
| C(1S) | 3750(2) | 2535(2) | -295(6)  | 73(2) |

Table S4. Bond lengths [Å] and angles [°] for **10**.

|                 |           |                   |            |
|-----------------|-----------|-------------------|------------|
| Co(1)-O(3)      | 1.838(3)  | N(1)-Co(1)-O(1)   | 94.67(10)  |
| Co(1)-N(1)      | 1.883(3)  | N(2)-Co(1)-O(1)   | 178.79(11) |
| Co(1)-N(2)      | 1.896(3)  | O(3)-Co(1)-O(2)   | 91.84(11)  |
| Co(1)-O(1)      | 1.900(2)  | N(1)-Co(1)-O(2)   | 177.24(13) |
| Co(1)-O(2)      | 1.899(2)  | N(2)-Co(1)-O(2)   | 95.22(11)  |
| Co(1)-O(4)      | 1.972(3)  | O(1)-Co(1)-O(2)   | 85.81(8)   |
| O(1)-C(13)      | 1.305(4)  | O(3)-Co(1)-O(4)   | 174.59(10) |
| O(2)-C(28)      | 1.300(4)  | N(1)-Co(1)-O(4)   | 89.31(13)  |
| O(3)-C(37)      | 1.425(5)  | N(2)-Co(1)-O(4)   | 89.23(12)  |
| O(4)-C(38)      | 1.422(4)  | O(1)-Co(1)-O(4)   | 91.44(10)  |
| N(1)-C(7)       | 1.289(5)  | O(2)-Co(1)-O(4)   | 87.95(11)  |
| N(1)-C(1)       | 1.423(4)  | C(13)-O(1)-Co(1)  | 127.8(2)   |
| N(2)-C(22)      | 1.300(4)  | C(28)-O(2)-Co(1)  | 126.3(2)   |
| N(2)-C(6)       | 1.414(4)  | C(37)-O(3)-Co(1)  | 120.3(2)   |
| C(1)-C(6)       | 1.383(5)  | C(38)-O(4)-Co(1)  | 124.7(2)   |
| C(1)-C(2)       | 1.398(5)  | C(7)-N(1)-C(1)    | 121.2(3)   |
| C(2)-C(3)       | 1.391(5)  | C(7)-N(1)-Co(1)   | 125.0(2)   |
| C(3)-C(4)       | 1.380(5)  | C(1)-N(1)-Co(1)   | 113.8(2)   |
| C(4)-C(5)       | 1.387(5)  | C(22)-N(2)-C(6)   | 121.6(3)   |
| C(5)-C(6)       | 1.390(5)  | C(22)-N(2)-Co(1)  | 123.7(2)   |
| C(7)-C(8)       | 1.431(5)  | C(6)-N(2)-Co(1)   | 113.7(2)   |
| C(8)-C(9)       | 1.415(5)  | C(6)-C(1)-C(2)    | 120.5(3)   |
| C(8)-C(13)      | 1.420(5)  | C(6)-C(1)-N(1)    | 113.9(3)   |
| C(9)-C(10)      | 1.361(5)  | C(2)-C(1)-N(1)    | 125.7(3)   |
| C(10)-C(11)     | 1.410(5)  | C(3)-C(2)-C(1)    | 119.2(4)   |
| C(10)-C(14)     | 1.527(5)  | C(4)-C(3)-C(2)    | 120.2(3)   |
| C(11)-C(12)     | 1.369(5)  | C(3)-C(4)-C(5)    | 120.5(4)   |
| C(12)-C(13)     | 1.434(5)  | C(4)-C(5)-C(6)    | 119.8(4)   |
| C(12)-C(18)     | 1.539(5)  | C(1)-C(6)-C(5)    | 119.8(3)   |
| C(14)-C(15)     | 1.512(6)  | C(1)-C(6)-N(2)    | 114.1(3)   |
| C(14)-C(16)     | 1.527(6)  | C(5)-C(6)-N(2)    | 126.0(3)   |
| C(14)-C(17)     | 1.526(5)  | N(1)-C(7)-C(8)    | 126.8(3)   |
| C(18)-C(19)     | 1.517(5)  | C(9)-C(8)-C(13)   | 120.9(3)   |
| C(18)-C(20)     | 1.530(5)  | C(9)-C(8)-C(7)    | 116.2(3)   |
| C(18)-C(21)     | 1.539(5)  | C(13)-C(8)-C(7)   | 122.9(3)   |
| C(22)-C(23)     | 1.423(5)  | C(10)-C(9)-C(8)   | 122.3(3)   |
| C(23)-C(24)     | 1.423(5)  | C(9)-C(10)-C(11)  | 115.6(3)   |
| C(23)-C(28)     | 1.416(4)  | C(9)-C(10)-C(14)  | 122.7(3)   |
| C(24)-C(25)     | 1.367(5)  | C(11)-C(10)-C(14) | 121.6(3)   |
| C(25)-C(26)     | 1.430(5)  | C(12)-C(11)-C(10) | 125.6(3)   |
| C(25)-C(29)     | 1.524(5)  | C(11)-C(12)-C(13) | 118.4(3)   |
| C(26)-C(27)     | 1.371(5)  | C(11)-C(12)-C(18) | 120.8(3)   |
| C(27)-C(28)     | 1.447(4)  | C(13)-C(12)-C(18) | 120.8(3)   |
| C(27)-C(33)     | 1.531(4)  | O(1)-C(13)-C(8)   | 122.6(3)   |
| C(29)-C(31)     | 1.526(5)  | O(1)-C(13)-C(12)  | 120.5(3)   |
| C(29)-C(32)     | 1.536(6)  | C(8)-C(13)-C(12)  | 116.9(3)   |
| C(29)-C(30)     | 1.541(5)  | C(15)-C(14)-C(16) | 109.7(5)   |
| C(33)-C(36)     | 1.523(6)  | C(15)-C(14)-C(10) | 109.0(4)   |
| C(33)-C(34)     | 1.532(5)  | C(16)-C(14)-C(10) | 110.8(3)   |
| C(33)-C(35)     | 1.550(5)  | C(15)-C(14)-C(17) | 108.2(4)   |
| O(1S)-C(1S)     | 1.378(5)  | C(16)-C(14)-C(17) | 106.4(4)   |
|                 |           | C(10)-C(14)-C(17) | 112.8(3)   |
| O(3)-Co(1)-N(1) | 90.84(12) | C(19)-C(18)-C(20) | 110.0(4)   |
| O(3)-Co(1)-N(2) | 85.40(12) | C(19)-C(18)-C(12) | 110.7(3)   |
| N(1)-Co(1)-N(2) | 84.33(11) | C(20)-C(18)-C(12) | 110.1(3)   |
| O(3)-Co(1)-O(1) | 93.94(10) | C(19)-C(18)-C(21) | 107.7(3)   |

|                   |          |                   |          |
|-------------------|----------|-------------------|----------|
| C(20)-C(18)-C(21) | 106.7(3) | O(2)-C(28)-C(27)  | 119.7(3) |
| C(12)-C(18)-C(21) | 111.5(3) | C(23)-C(28)-C(27) | 117.4(3) |
| N(2)-C(22)-C(23)  | 126.0(3) | C(31)-C(29)-C(25) | 109.4(3) |
| C(24)-C(23)-C(28) | 120.7(3) | C(31)-C(29)-C(32) | 110.0(3) |
| C(24)-C(23)-C(22) | 115.3(3) | C(25)-C(29)-C(32) | 110.2(3) |
| C(28)-C(23)-C(22) | 124.0(3) | C(31)-C(29)-C(30) | 108.0(3) |
| C(25)-C(24)-C(23) | 122.8(3) | C(25)-C(29)-C(30) | 111.8(3) |
| C(24)-C(25)-C(26) | 114.9(3) | C(32)-C(29)-C(30) | 107.4(3) |
| C(24)-C(25)-C(29) | 124.1(3) | C(36)-C(33)-C(27) | 110.2(3) |
| C(26)-C(25)-C(29) | 121.0(3) | C(36)-C(33)-C(34) | 107.1(3) |
| C(27)-C(26)-C(25) | 125.8(3) | C(27)-C(33)-C(34) | 112.0(3) |
| C(26)-C(27)-C(28) | 117.9(3) | C(36)-C(33)-C(35) | 110.6(3) |
| C(26)-C(27)-C(33) | 121.1(3) | C(27)-C(33)-C(35) | 109.7(3) |
| C(28)-C(27)-C(33) | 121.0(3) | C(34)-C(33)-C(35) | 107.2(3) |
| O(2)-C(28)-C(23)  | 122.9(3) |                   |          |

Table S5. Anisotropic displacement parameters ( $\text{\AA}^2 \times 10^3$ ) for **10**. The anisotropic displacement factor exponent takes the form:  $-2\pi^2 [h^2 a^{*2} U^{11} + \dots + 2 h k a^* b^* U^{12}]$

|       | $U^{11}$ | $U^{22}$ | $U^{33}$ | $U^{23}$ | $U^{13}$ | $U^{12}$ |
|-------|----------|----------|----------|----------|----------|----------|
| Co(1) | 17(1)    | 13(1)    | 23(1)    | 0(1)     | -4(1)    | 0(1)     |
| O(1)  | 19(1)    | 13(1)    | 26(2)    | -3(1)    | -8(1)    | 2(1)     |
| O(2)  | 18(1)    | 14(1)    | 26(2)    | -2(1)    | -4(1)    | -1(1)    |
| O(3)  | 24(1)    | 13(1)    | 38(2)    | 1(1)     | -2(1)    | 1(1)     |
| O(4)  | 53(2)    | 19(1)    | 26(2)    | 2(1)     | 7(1)     | 3(1)     |
| N(1)  | 22(2)    | 13(1)    | 27(2)    | 3(1)     | -7(2)    | 1(1)     |
| N(2)  | 26(2)    | 13(1)    | 26(2)    | -4(1)    | 0(2)     | -1(1)    |
| C(1)  | 27(2)    | 14(2)    | 21(3)    | -2(1)    | -1(2)    | 3(2)     |
| C(2)  | 32(2)    | 20(2)    | 42(3)    | -2(2)    | -15(2)   | 0(2)     |
| C(3)  | 33(2)    | 13(2)    | 53(4)    | -3(2)    | -10(2)   | -5(2)    |
| C(4)  | 40(2)    | 14(2)    | 44(3)    | -1(2)    | -8(3)    | 5(2)     |
| C(5)  | 31(2)    | 17(2)    | 30(3)    | -2(2)    | -10(2)   | 3(2)     |
| C(6)  | 26(2)    | 16(2)    | 26(3)    | -6(2)    | -4(2)    | 1(1)     |
| C(7)  | 27(2)    | 18(2)    | 27(3)    | -3(2)    | -8(2)    | -1(2)    |
| C(8)  | 18(2)    | 18(2)    | 26(3)    | 0(2)     | -5(2)    | 3(2)     |
| C(9)  | 20(2)    | 16(2)    | 29(3)    | -9(2)    | -3(2)    | 0(2)     |
| C(10) | 14(2)    | 25(2)    | 22(3)    | -1(2)    | 0(2)     | 3(2)     |
| C(11) | 22(2)    | 15(2)    | 23(3)    | -2(2)    | -1(2)    | 10(2)    |
| C(12) | 21(2)    | 19(2)    | 20(2)    | 1(2)     | -1(2)    | 5(2)     |
| C(13) | 22(2)    | 19(2)    | 15(2)    | -1(2)    | -3(2)    | 0(2)     |
| C(14) | 17(2)    | 25(2)    | 35(3)    | -4(2)    | -10(2)   | 6(2)     |
| C(15) | 17(2)    | 127(5)   | 71(5)    | -51(4)   | -14(3)   | 9(3)     |
| C(16) | 110(5)   | 74(4)    | 114(6)   | 56(4)    | -93(5)   | -45(3)   |
| C(17) | 41(3)    | 57(3)    | 57(4)    | -28(3)   | -33(3)   | 17(2)    |
| C(18) | 26(2)    | 11(2)    | 27(3)    | -2(2)    | -2(2)    | 1(2)     |
| C(19) | 28(2)    | 19(2)    | 36(3)    | -3(2)    | 5(2)     | 1(2)     |
| C(20) | 34(2)    | 28(2)    | 24(3)    | -3(2)    | -2(2)    | 3(2)     |
| C(21) | 33(2)    | 19(2)    | 40(3)    | -8(2)    | -10(2)   | 6(2)     |
| C(22) | 16(2)    | 16(2)    | 27(3)    | 3(2)     | -7(2)    | 3(2)     |
| C(23) | 14(2)    | 19(2)    | 21(2)    | 3(2)     | 0(2)     | -1(2)    |
| C(24) | 17(2)    | 19(2)    | 23(3)    | 1(2)     | -1(2)    | 1(2)     |
| C(25) | 10(2)    | 25(2)    | 20(2)    | 3(2)     | 0(2)     | -5(2)    |
| C(26) | 17(2)    | 16(2)    | 24(3)    | -2(2)    | 2(2)     | -3(2)    |
| C(27) | 15(2)    | 17(2)    | 17(2)    | -3(2)    | 4(2)     | -1(1)    |
| C(28) | 11(2)    | 20(2)    | 13(2)    | -1(2)    | 0(2)     | 0(1)     |
| C(29) | 24(2)    | 25(2)    | 22(3)    | 2(2)     | -7(2)    | -1(2)    |
| C(30) | 41(2)    | 35(2)    | 42(3)    | 8(2)     | -21(2)   | -7(2)    |
| C(31) | 28(2)    | 37(2)    | 47(3)    | 5(2)     | -10(2)   | -6(2)    |
| C(32) | 54(3)    | 60(3)    | 27(3)    | -3(2)    | -14(2)   | 8(2)     |
| C(33) | 20(2)    | 14(2)    | 23(3)    | -2(2)    | 0(2)     | -1(2)    |
| C(34) | 29(2)    | 16(2)    | 35(3)    | 0(2)     | 3(2)     | -8(2)    |
| C(35) | 22(2)    | 23(2)    | 41(3)    | -6(2)    | 4(2)     | 4(2)     |
| C(36) | 41(2)    | 20(2)    | 19(2)    | 0(2)     | -6(3)    | -1(2)    |
| C(37) | 49(3)    | 38(3)    | 33(3)    | 6(2)     | 11(3)    | 3(2)     |
| C(38) | 41(2)    | 29(2)    | 27(3)    | 0(2)     | 5(2)     | -1(2)    |
| O(1S) | 42(2)    | 32(2)    | 67(3)    | 29(2)    | -6(2)    | -10(2)   |
| C(1S) | 31(3)    | 59(3)    | 131(6)   | 48(4)    | 0(3)     | -3(2)    |

Table S6. Hydrogen coordinates ( $\times 10^4$ ) and isotropic displacement parameters ( $\text{\AA}^2 \times 10^3$ ) for **10**.

|        | x        | y        | z         | U(eq)  |
|--------|----------|----------|-----------|--------|
| H(40)  | 1993(15) | 2038(16) | 3530(40)  | 51(12) |
| H(2)   | 3328(15) | 3217(12) | 2570(30)  | 24(10) |
| H(3)   | 2913(16) | 3946(13) | 2160(30)  | 37(11) |
| H(4)   | 2021(14) | 3957(13) | 1230(30)  | 30(10) |
| H(5)   | 1556(15) | 3260(11) | 740(40)   | 23(10) |
| H(7)   | 3530(15) | 2435(14) | 3150(40)  | 47(13) |
| H(9)   | 4179(12) | 1980(12) | 3900(30)  | 7(8)   |
| H(11)  | 4302(13) | 539(12)  | 3690(30)  | 14(9)  |
| H(15A) | 5354     | 928      | 3445      | 108    |
| H(15B) | 5711     | 1226     | 4388      | 108    |
| H(15C) | 5390     | 1533     | 3405      | 108    |
| H(16A) | 4930     | 513      | 5100      | 149    |
| H(16B) | 4493     | 812      | 5890      | 149    |
| H(16C) | 5151     | 881      | 6090      | 149    |
| H(17A) | 5241     | 1731     | 5879      | 78     |
| H(17B) | 4575     | 1790     | 5860      | 78     |
| H(17C) | 4946     | 2046     | 4877      | 78     |
| H(19A) | 2875     | 126      | 3605      | 42     |
| H(19B) | 2772     | -214     | 2490      | 42     |
| H(19C) | 2617     | 375      | 2472      | 42     |
| H(20A) | 3360     | -91      | 755       | 43     |
| H(20B) | 3863     | 309      | 772       | 43     |
| H(20C) | 3229     | 503      | 739       | 43     |
| H(21A) | 3735     | -504     | 2418      | 46     |
| H(21B) | 3846     | -204     | 3588      | 46     |
| H(21C) | 4240     | -108     | 2502      | 46     |
| H(22)  | 1294(11) | 2539(10) | 260(30)   | 4(8)   |
| H(24)  | 673(11)  | 2149(11) | -850(30)  | 3(8)   |
| H(26)  | 595(13)  | 658(12)  | -1250(30) | 22(10) |
| H(30A) | -84      | 2212     | -1909     | 59     |
| H(30B) | -253     | 2021     | -3165     | 59     |
| H(30C) | 387      | 2142     | -2871     | 59     |
| H(31A) | -389     | 906      | -1469     | 56     |
| H(31B) | -718     | 1274     | -2326     | 56     |
| H(31C) | -552     | 1467     | -1072     | 56     |
| H(32A) | 676      | 1242     | -3473     | 71     |
| H(32B) | 37       | 1227     | -3883     | 71     |
| H(32C) | 278      | 787      | -3077     | 71     |
| H(34A) | 1048     | -430     | 42        | 40     |
| H(34B) | 988      | -86      | -1080     | 40     |
| H(34C) | 555      | -21      | -44       | 40     |
| H(35A) | 2194     | 413      | 303       | 43     |
| H(35B) | 1968     | 219      | -910      | 43     |
| H(35C) | 2024     | -168     | 139       | 43     |
| H(36C) | 1383(11) | -106(12) | 1800(30)  | 18(8)  |
| H(36B) | 1484(14) | 477(12)  | 2000(30)  | 18(9)  |
| H(36A) | 862(19)  | 284(14)  | 1840(50)  | 71(16) |
| H(37C) | 3035(13) | 1531(13) | -1320(40) | 35(11) |
| H(37B) | 2664(16) | 1085(15) | -490(40)  | 43(12) |
| H(37A) | 3360(20) | 1328(16) | 10(40)    | 65(15) |
| H(38A) | 1922     | 952      | 3306      | 49     |
| H(38B) | 1725     | 1294     | 4364      | 49     |
| H(38C) | 2377     | 1211     | 4123      | 49     |



|        |          |          |          |        |
|--------|----------|----------|----------|--------|
| H(1O5) | 3068(18) | 2386(14) | -450(40) | 25(15) |
| H(1S1) | 3906     | 2870     | -129     | 110    |
| H(1S2) | 3967     | 2375     | -910     | 110    |
| H(1S3) | 3769     | 2324     | 395      | 110    |

---
